# Supplementary material for: Involvement of FtsE ATPase and FtsX Extracellular Loops 1 and 2 in FtsEX-PcsB Complex Function in Cell Division of Streptococcus pneumoniae D39
Source: PubMed Central journal article supplement — mBio. 2013 Jul 16;4(4):e00431-13. doi: 10.1128/mBio.00431-13 (PMC3735124; doi:10.1128/mbio.00431-13), 2013-07-16
Supplement: mbo004131562sf04.pdf [file mbo004131562sf04.pdf]

## A. ECL1<sup>FtsX</sup>

```

Lla_I11403      --ILNTSKISNGIENNVRIVAYMKLDVHDQETKIQDPKDNKKTINNPDLHKIYDSIKKVP 58
Spy_MGAS10394  ----NIQRVASGVENNVIHINTYLQVDSTDAAKVIQNTAG--EPVNNNDYHSVYDKIAQIK 54
Spn_D39        SVIFNTAKLATDIENNVRVVYIRKDVEDNSQTIEKE-G--QTVTNNDYHKVYDSLKNMS 57
Smi_B6         -----KLATDIENNVRVMVYIRKDVADNSEETIEKE-G--QTVTNNDYHKVYNALKGMS 50
Sth_LMD-9     -VILNTQKLASDIEKNIQVNVYLDPDSTDASETVKELSG--QIVANKDYHKIYNALTKIK 57
Efa_TX1330    ----NATKLAQDIEGNVDVSVFVDIGTKD-----EEMKKLEKELNDLD 39
Ban_Ames      -AIMNMNHFATKVEQDVEIRVHIDPAAKEADQ-----KKLEDDMSKIA 42
Bsu_168       --MLNLNNMATNAEKQVEIKVLIDLTDQKAQ-----DKLQNDIKELK 41
               ..:  * :: : . :      :      .: . : :

Lla_I11403      NVKTVFEFSSKEAQLKELTKALGNWNLFKG--DANPLYDAYIVEADKPANVKSVTSKISK 116
Spy_MGAS10394  GVKKITFSSKDEQLKKLQETLGDVWNMYDQ--DTNPLQDIYLIETQTPKQVKAITKKIRT 112
Spn_D39        TVKSVTFSSKEEQYEKLTETIMGDNWKIFEG--DANPLYDAYIVEANTPNDVKTIAEDAKK 115
Smi_B6         TVKSVTFSSKEEQYEKLTETIMGDNWKIFEG--DANPLYDAYIVDTNTPSDVKTVAEEAKK 108
Sth_LMD-9     GVDKVTFSSKEEQKQLIETMGSSFETATG--DANPLSDVYIVQTKSPDDVSRVAKEAKA 115
Efa_TX1330    HVKKVEFSSKEEQELKKIQNEMGDSWKLFEQ--DNNPLYDVYVVSATDPSYTKQVAEKAAD 97
Ban_Ames      KVESIKYSSKEEELKRLIKSLGDSGKTFELFEQDNPLKNVFFVVKAKEPTDTATIAKKIEK 102
Bsu_168       GIQSVTFSSKEKELDQLVDSFGKSLTMKDQENPLNDAFVVKTTDPHDTPNVAKKIEK 101
               :..: :***: : ..: . :* :      : *** : : : : * . : : :

Lla_I11403      LSGIEKATYGGANTAKLFQIAQGIRTWGT 145
Spy_MGAS10394  IEGVEAADYGGINSKLFKFS----- 133
Spn_D39        IEGVSEVQDGGANTERLFLKASFIRV--- 141
Smi_B6         IEGVSEVQDGGANTERLFLKASFIRV--- 130
Sth_LMD-9     IQGVDNANFGGSDTEILMATMKRVQFWGI 144
Efa_TX1330    LKNVSRSDYGGASSDRIFQIAGAVRTWG- 125
Ban_Ames      MQFVSNVQYGGQVERLFDTVKTGRNIGI 131
Bsu_168       MDHVYKVTYGKEEVSRLFKVVGVSARN--- 127
               :. :      * .      : :

```

● Changes (A177V, F179S, W183L, and S264L) that suppress either *pcsB*<sup>L78S</sup><sub>L219P</sub> or *pcsB*<sup>A160P</sup> Ts mutation

● Changes (V266A and Q268E) that are allele specific and only suppress the *pcsB*<sup>L78S L219P</sup> Ts mutation

● *ftsX*<sup>150K</sup> Ts mutation

— Consecutive identical amino acids

## B. ECL2<sup>FtsX</sup>

```

Spy_MGAS10394  ---YDLVYKHFAQELQRNNLSMYPLDP- 24
Spn_D39        FIVYQIVYQSVNKSQVQNLQNLSPDLF 28
Smi_B6         ---YKMVYQSVNKSQVQNLQNLSPDLF 24
Efa_TX1330    -----QLINPSLLRSHYSLIHPEN- 19
Lla_I11403    -----VSLTPSLQSQKLAMFAPKE- 19
Ban_Ames      -VTYNSLQGMFNEKLGGTIFELLPYSP- 26
Bsu_168       -----GWVVPKVQGSFVSLLPYNP- 19
Sth_LMD-9     -----YSTLNPDFVKGGISMYDAD-- 19
               . . . : .

```

. . . : .
